# Supplementary material
Source: Springer Nature journal article supplement (https://www.springermedizin.de/resource/supplementary/13256_2009_938_MOESM9_ESM.pdf/9646858)

SpO2 (10 % por divisão)

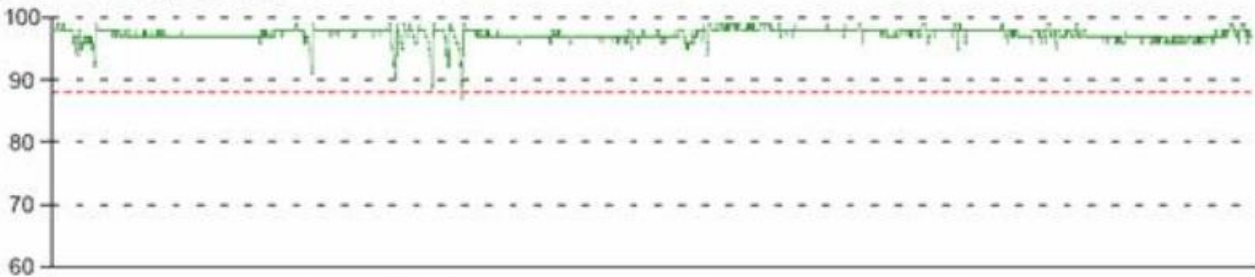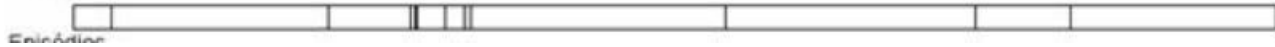

Evento

Supplement: MOESM9 [file 9646858]
